# Supplementary material for: Effects of drought stress and subsequent rewatering on photosynthetic and respiratory pathways in Nicotiana sylvestris wild type and the mitochondrial complex I-deficient CMSII mutant
Source: PubMed Central journal article supplement — J Exp Bot. 2009 Nov 20;61(3):765–75. doi: 10.1093/jxb/erp344 (PMC2814110; doi:10.1093/jxb/erp344), 2009-11-20
Supplement: erp344_1.pdf [file erp344_1.pdf]

**Title: Effects of drought stress and subsequent re-watering on photosynthetic and respiratory pathways in *Nicotiana sylvestris* wildtype and the mitochondrial complex I deficient CMSII mutant**

Alexander Galle, Igor Florez-Sarasa, Afwa Thameur, Rosine de Paepe, Jaume Flexas and Miquel Ribas-Carbo

**Supplementary Figure 1**

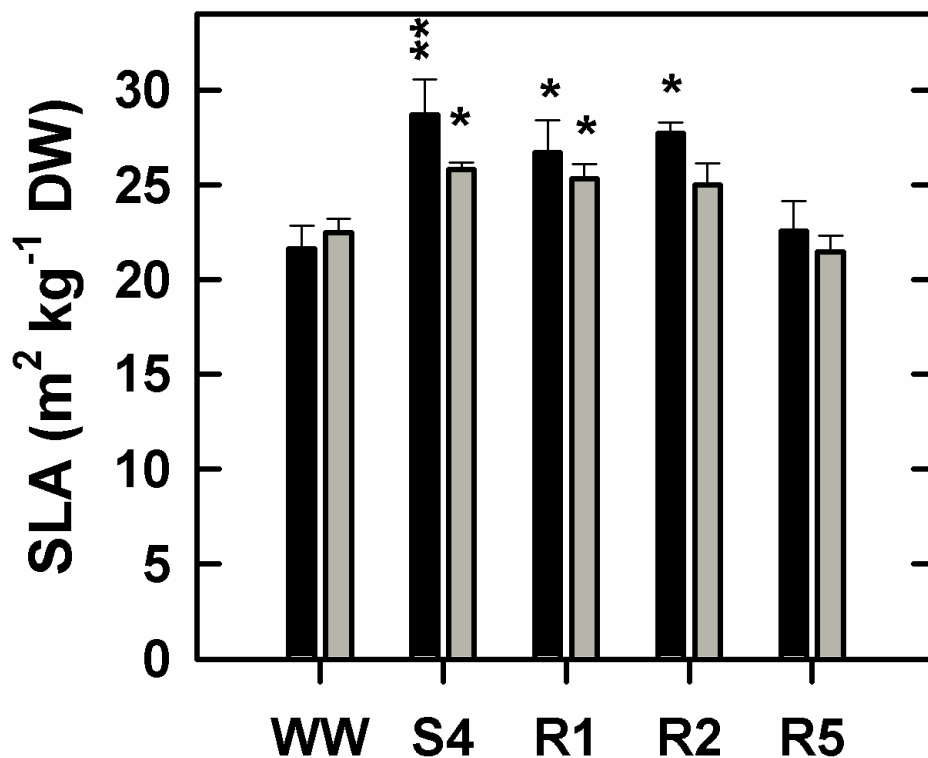

Changes of specific leaf area (SLA) during the experiment in WT and CMSII plants. WW, S4, R1, R2 and R5 denote for the start of experiment (well-watered), the end of severe drought stress (day 9), the first two days (day 10, 11) and the last day of re-watering (day 14), respectively. Means and standard errors of at least four plants are shown. Asterisks indicate significant differences to control values ( $p \leq 0.05^*$  and  $\leq 0.01^{**}$ ).
